# Supplementary material
Source: PubMed Central journal article supplement (PMC6628901)
Supplement: NIHMS1526993-supplement-1.pdf [file NIHMS1526993-supplement-1.pdf]

## **SUPPLEMENTAL INFORMATION ITEMS**

Supplemental information includes five figures and one table.

Figure S1. Related to Figure 2

A

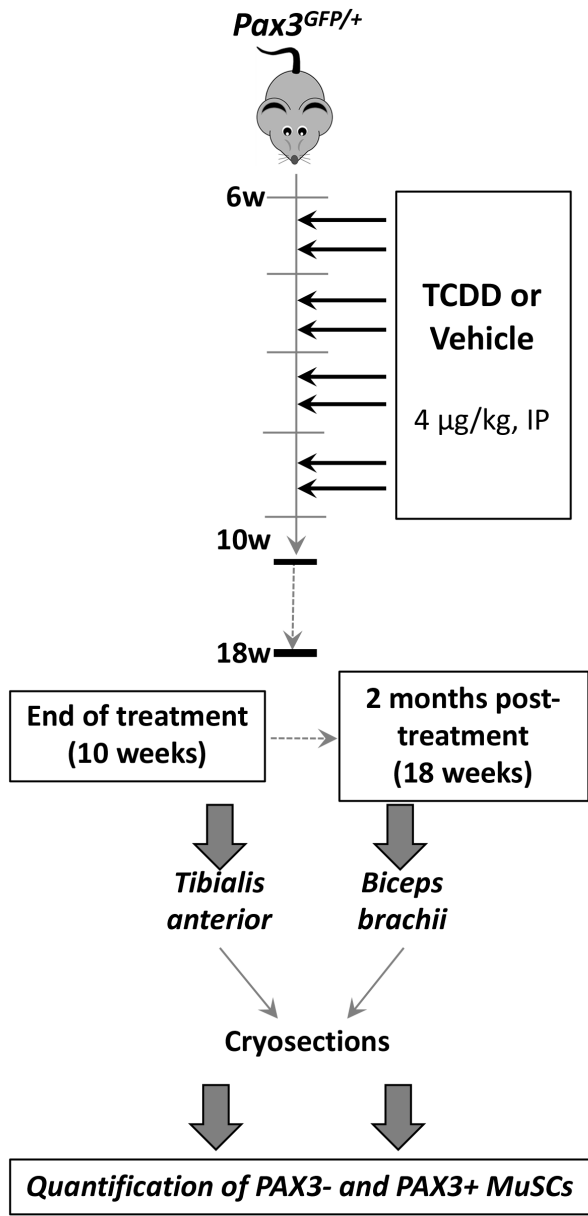

B

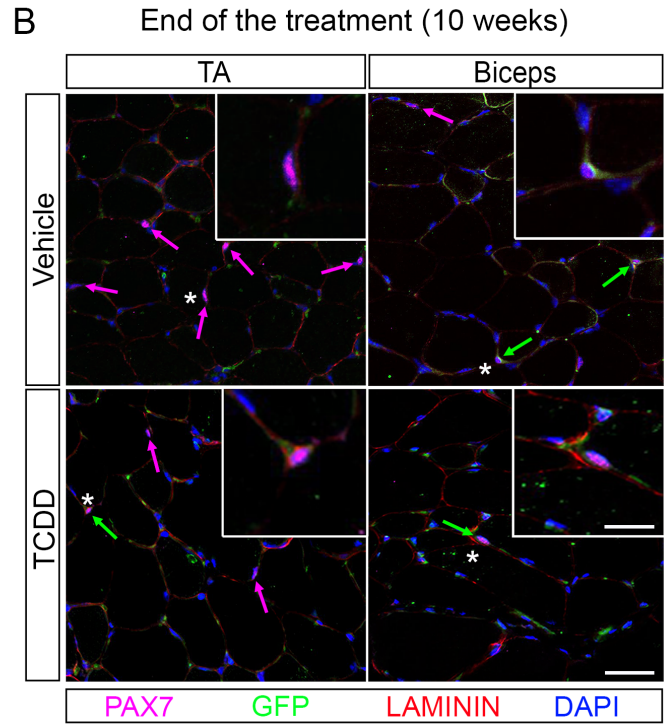

C

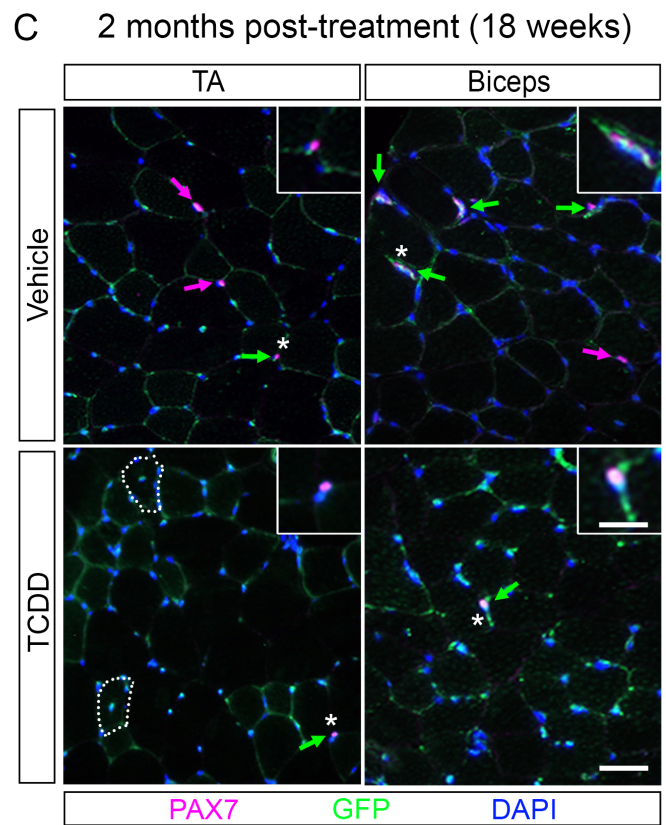

### Figure S1. Related to Figure 2

**(A)** Experimental design: *Pax3*<sup>GFP/+</sup> mice received intraperitoneal administration of vehicle (nonane) or TCDD (4µg/kg) twice a week during four weeks before analysis at the end of the treatment (10 weeks) or 2 months (18 weeks) post-treatment.

**(B, C)** Representative co-immunofluorescence staining of PAX7 (pink), GFP (PAX3 reporter, green), LAMININ (red) and nuclei (DAPI, blue) performed on *Tibialis Anterior* (TA) or *Biceps brachii* (Biceps) muscle sections from *Pax3*<sup>GFP/+</sup> mice receiving vehicle (nonane, top) or TCDD (4µg/kg, bottom) twice a week during four weeks and analyzed at the end of the treatment (10 weeks) **(B)** or 2 months (18 weeks) post-treatment **(C)**. Pink and green arrows represent respectively PAX3- and PAX3+ MuSCs. Asterisks represent MuSCs shown in the inset. Scale bar, 40µm (overview) or 20µm (inset).

Figure S2. Related to Figure 3

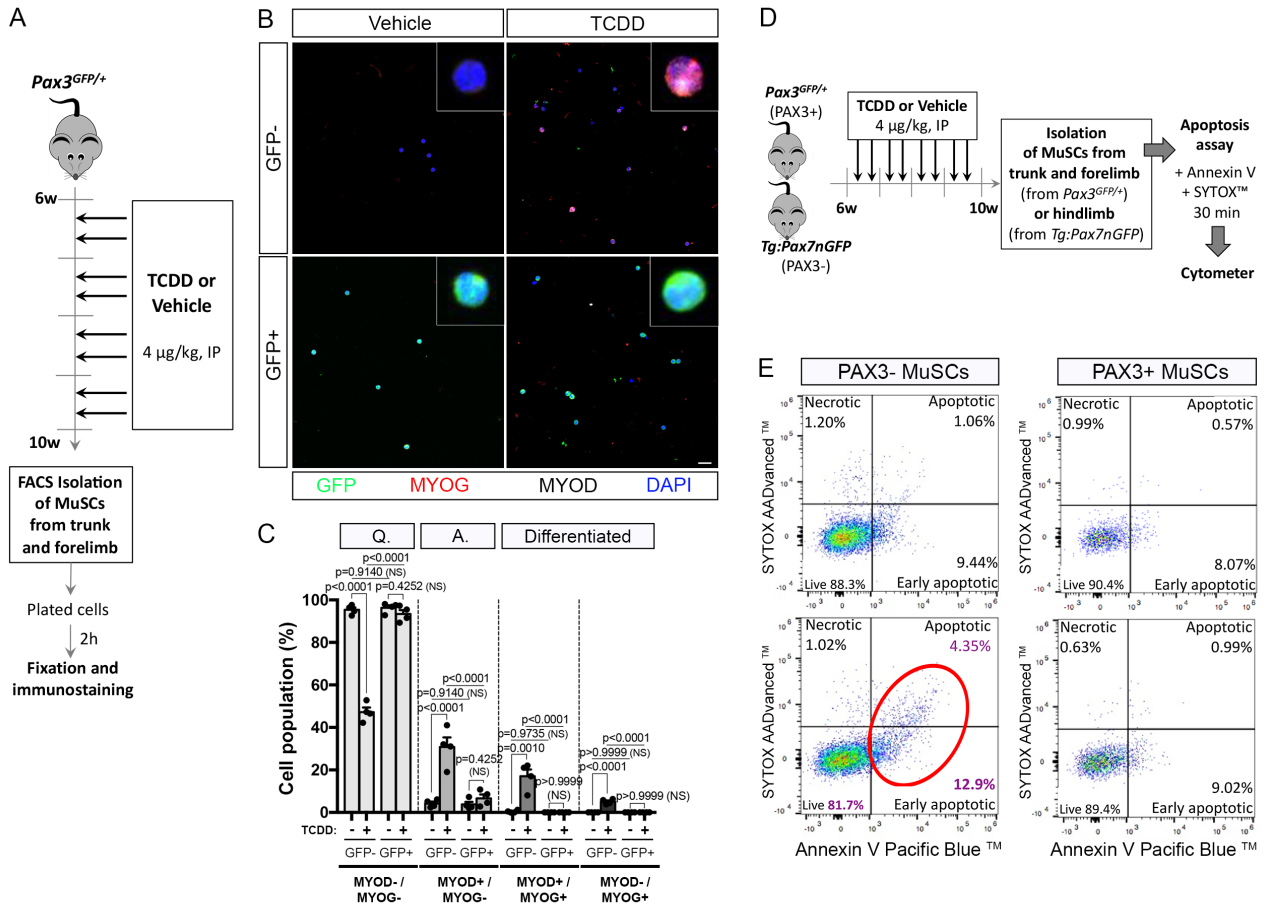

## Figure S2. Related to Figure 3

**(A)** Experimental design: *Pax3*<sup>GFP/+</sup> mice received intraperitoneal administration of vehicle (nonane) or TCDD (4µg/kg) twice a week during four weeks. PAX3+ (GFP+) and PAX3- (GFP-) MuSCs were isolated by flow cytometry from trunk and forelimb muscles, plated for 2h before fixation and analysis by co-immunostaining.

**(B)** Representative co-immunofluorescence staining of GFP (PAX3 reporter, green), MYOG (red), MYOD (white) and nuclei (DAPI, blue) from isolated PAX3+ (GFP+) and PAX3- (GFP-) MuSCs from *Pax3*<sup>GFP/+</sup> mice receiving vehicle (nonane) or TCDD (4µg/kg).

**(C)** Quantification of **(B)** showing quiescent (MYOD-/MYOG-), activated (MYOD+/MYOG-) and differentiated (MYOG+) MuSCs within isolated PAX3-negative (GFP-) and PAX3-positive (GFP+) MuSCs from *Pax3*<sup>GFP/+</sup> mice receiving vehicle (nonane) or TCDD (4µg/kg). Means ± SEM (n=4), two-way ANOVA. *P* values calculated by Sidak's post-test. N.S., not significant.

**(D)** Experimental design: *Pax3*<sup>GFP/+</sup> or *Tg:Pax7nGFP* mice received intraperitoneal administration of vehicle (nonane) or TCDD (4µg/kg) twice a week during four weeks before isolation of MuSCs from trunk and forelimb (*Pax3*<sup>GFP/+</sup>, PAX3+ MuSCs) or hindlimb (*Tg:Pax7nGFP*, PAX3- MuSCs) muscles and cell death analysis by Flow Cytometry using Annexin V and SYTOX™ labeling.

**(E)** Representative dot blots showing living cells (Annexin V-; Sytox-), early apoptotic (Annexin V+; Sytox-), apoptotic (Annexin V+; Sytox+) and necrotic cells (Annexin V-; Sytox+) in PAX3- MuSCs (isolated from *Tg:Pax7nGFP* hindlimb muscles, left) or PAX3+ MuSCs (isolated from *Pax3*<sup>GFP/+</sup> trunk and forelimb muscles, right). Red circle highlights atypical apoptosis in PAX3- MuSCs.

**Figure S3. Related to Figure 5**

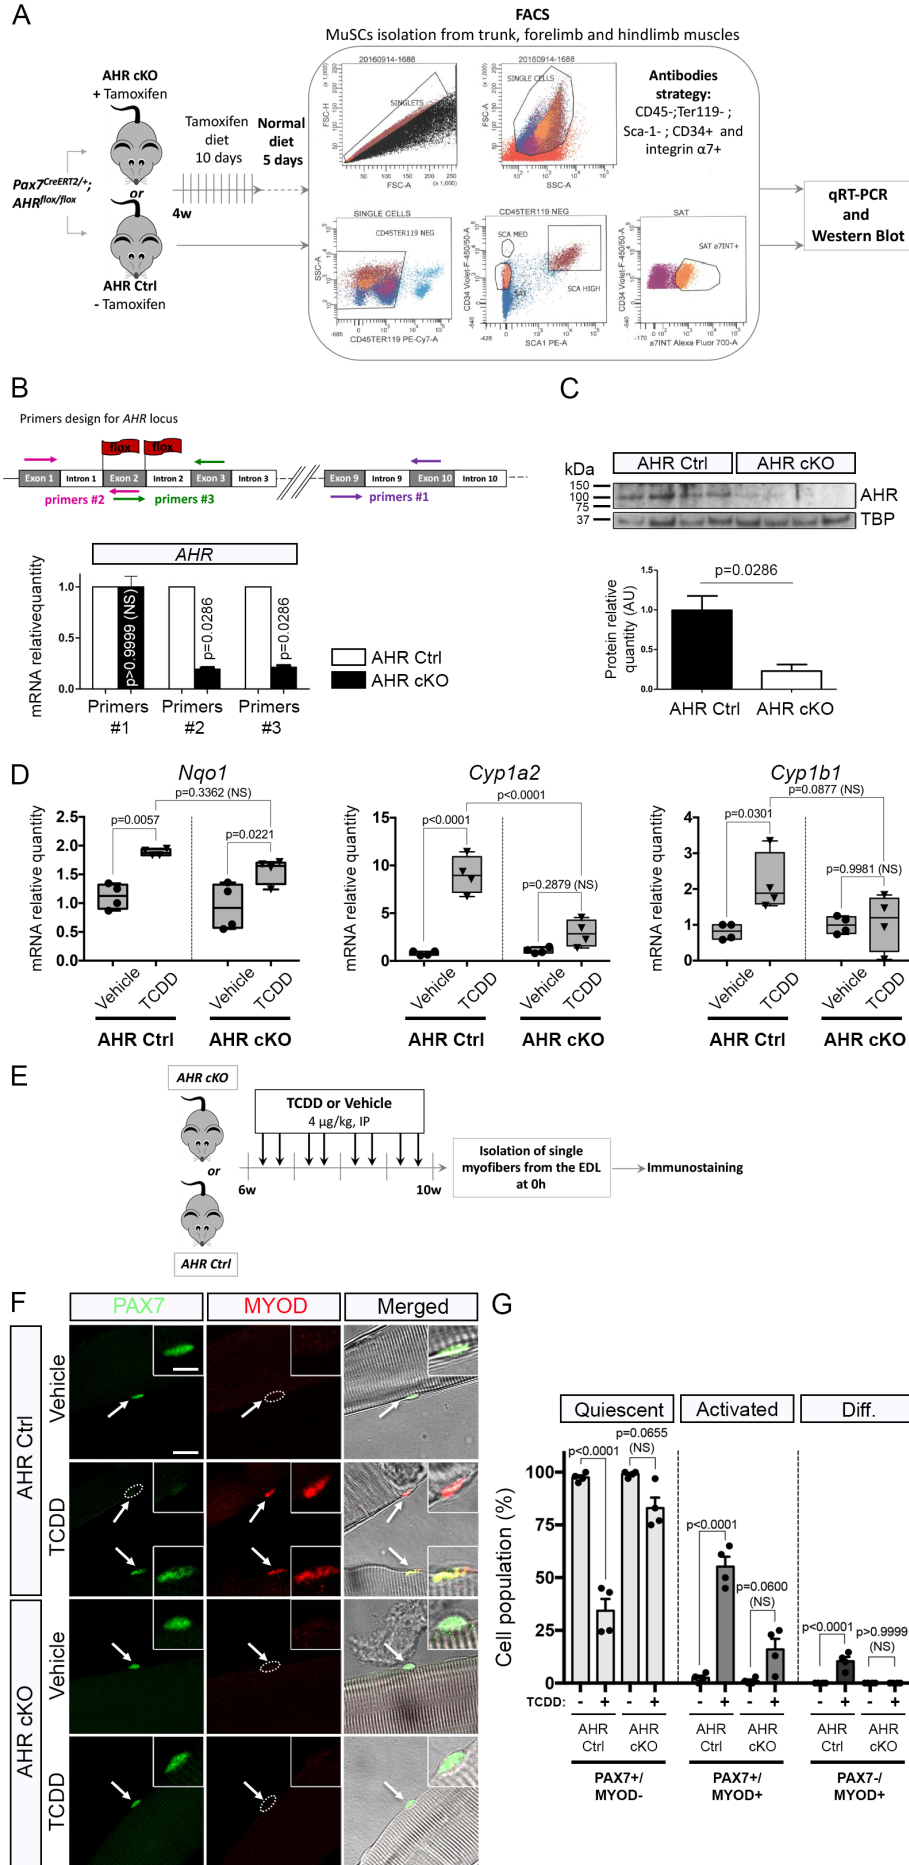

### Figure S3. Related to Figure 5

**(A)** Experimental design: *Pax7<sup>creERT2/+</sup>*; *AHR<sup>flox/flox</sup>* mice fed with tamoxifen or control diet (AHR cKO and AHR Ctrl mice, respectively) before flow-cytometry isolation of MuSCs from trunk, forelimb and hindlimb muscles, using an antibodies-based strategy (CD45-; Ter119-; Sca-1-; CD34+ and integrin  $\alpha$ 7+) (Stantzou et al., 2017). Total RNA isolation and protein extraction from MuSCs was performed to evaluate *AHR* gene expression and AHR protein expression by quantitative Polymerase Chain Reaction (qRT-PCR) and western-blot, respectively.

**(B)** Evaluation of deletion evaluation of AHR exon2 by qPCR. Relative expression of *AHR* mRNA containing (primers #1) or lacking (primers #2 or #3) exon 2 in MuSCs from AHR cKO and AHR Ctrl mice are shown normalized by *Tbp* and *Hprt1* expression Means  $\pm$  SEM (n=3), Mann-Whitney test.

**(C)** Representative western-blot and quantification of AHR protein in MuSCs from AHR cKO and AHR Ctrl mice normalized by TBP protein expression. Means  $\pm$  SEM (n=4), Mann-Whitney test.

**(D)** Box plot showing the relative expression of AHR target genes (*Nqo1*, *Cyp1a2* and *AHR*) normalized to *Tbp* and *Hprt1* in MuSCs isolated from AHR Ctrl and AHR cKO mice treated with vehicle (nonane) or TCDD (4 $\mu$ g/kg). Means  $\pm$  SEM (n=4), two-way ANOVA. *P* values calculated by Sidak's post-test. N.S., not significant.

**(E)** Experimental design: *Pax7Cre<sup>ERT2/+</sup>*; *AHR<sup>flox/flox</sup>* mice received tamoxifen food (AHR cKO) or control diet (AHR Ctrl) during 10 days followed by 5 days of normal diet prior to intraperitoneal administration of vehicle (nonane) or TCDD (4 $\mu$ g/kg) twice a week during four weeks. Isolation of freshly single myofibers from *extensor digitorum longus* (EDL) was performed to examine the myogenic status of MuSCs using co-immunostaining.

**(F)** Representative co-immunofluorescence staining of single myofibers from *extensor digitorum longus* (EDL) isolated from AHR Ctrl and AHR cKO mice receiving vehicle (nonane) or TCDD (4 $\mu$ g/kg), using antibodies against PAX7 (green), MYOD (red) and nuclei (DAPI, blue). Scale bars, 20  $\mu$ m (overview) and 10  $\mu$ m (inset).

**(G)** Quantification of **(F)** showing quiescent (PAX7+/MYOD-), activated (PAX7+/MYOD+) and differentiated (PAX7-/MYOD+) MuSCs within single myofibers of EDL isolated from AHR Ctrl (top) and AHR cKO (bottom) mice receiving vehicle (nonane) or TCDD (4 $\mu$ g/kg). Means  $\pm$  SEM (n=4), two-way ANOVA. *P* values calculated by Sidak's post-test. N.S., not significant.

Figure S4. Related to Figure 6

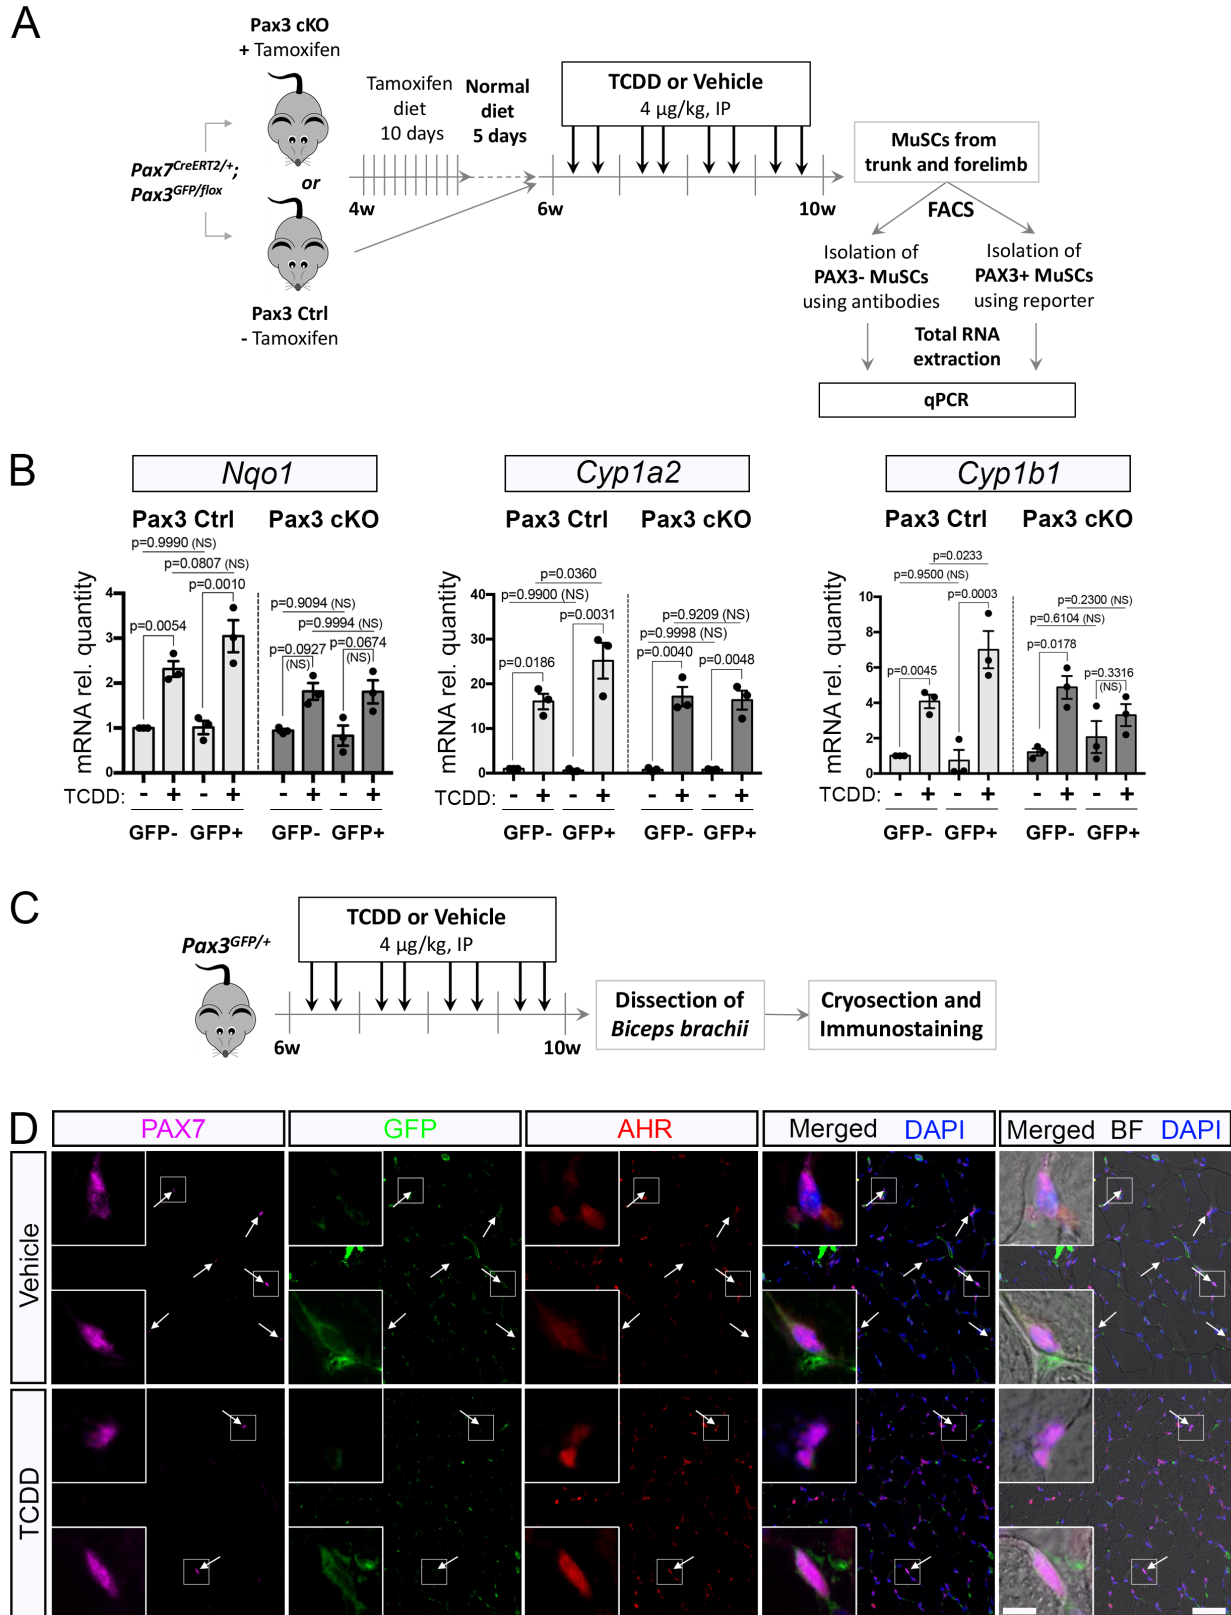



#### Figure S4. Related to Figure 6

**(A)** Experimental design: *Pax7<sup>creERT2/+</sup>*; *Pax3<sup>GFP/flox</sup>* received normal diet (Pax3 Ctrl) or tamoxifen food (Pax3 cKO) for 10 days followed by 5 days of normal diet prior to intraperitoneal administration of vehicle (nonane) or TCDD (4µg/kg) twice a week during four weeks. PAX3+ (GFP+) and PAX3- (GFP-) MuSCs were isolated by flow cytometry for gene expression studies.

**(B)** MuSCs were isolated from Pax3 Ctrl or Pax3 cKO trunk and forelimb muscles by antibody-based flow cytometry combined with GFP reporter to distinguish PAX3+ (GFP+) from PAX3- (GFP-) MuSCs. Total RNA was extracted and gene expression study performed by quantitative Polymerase Chain Reaction (qPCR). Relative expression to *Tbp* and *Hprt1* of AHR-target genes (*Nqo1*, *Cyp1a2*, *Cyp1b1*) in MuSCs from GFP- (PAX3-) or GFP+ (PAX3+) MuSCs. Means ± SEM (n=3), two way ANOVA. *P* values calculated from Sidak's post-test. N.S., not significant.

**(C)** Experimental design: *Pax3<sup>GFP/+</sup>* mice fed with or without tamoxifen received intraperitoneal administration of vehicle (nonane) or TCDD (4µg/kg) twice a week during four weeks before immunohistological analysis on biceps cryosections.

**(D)** Representative co-immunofluorescence staining of PAX7 (pink), GFP (PAX3 reporter, green), AHR (red) and nuclei (DAPI, blue) from biceps muscle sections from *Pax3<sup>GFP/+</sup>* mice receiving vehicle (nonane, top) or TCDD (4µg/kg, bottom) as indicated. Arrows show PAX7+ MuSCs. BF, Brightfield. Scale bars, 100 µm (overview), 10 µm (insets).

Figure S5. Related to Figure 7

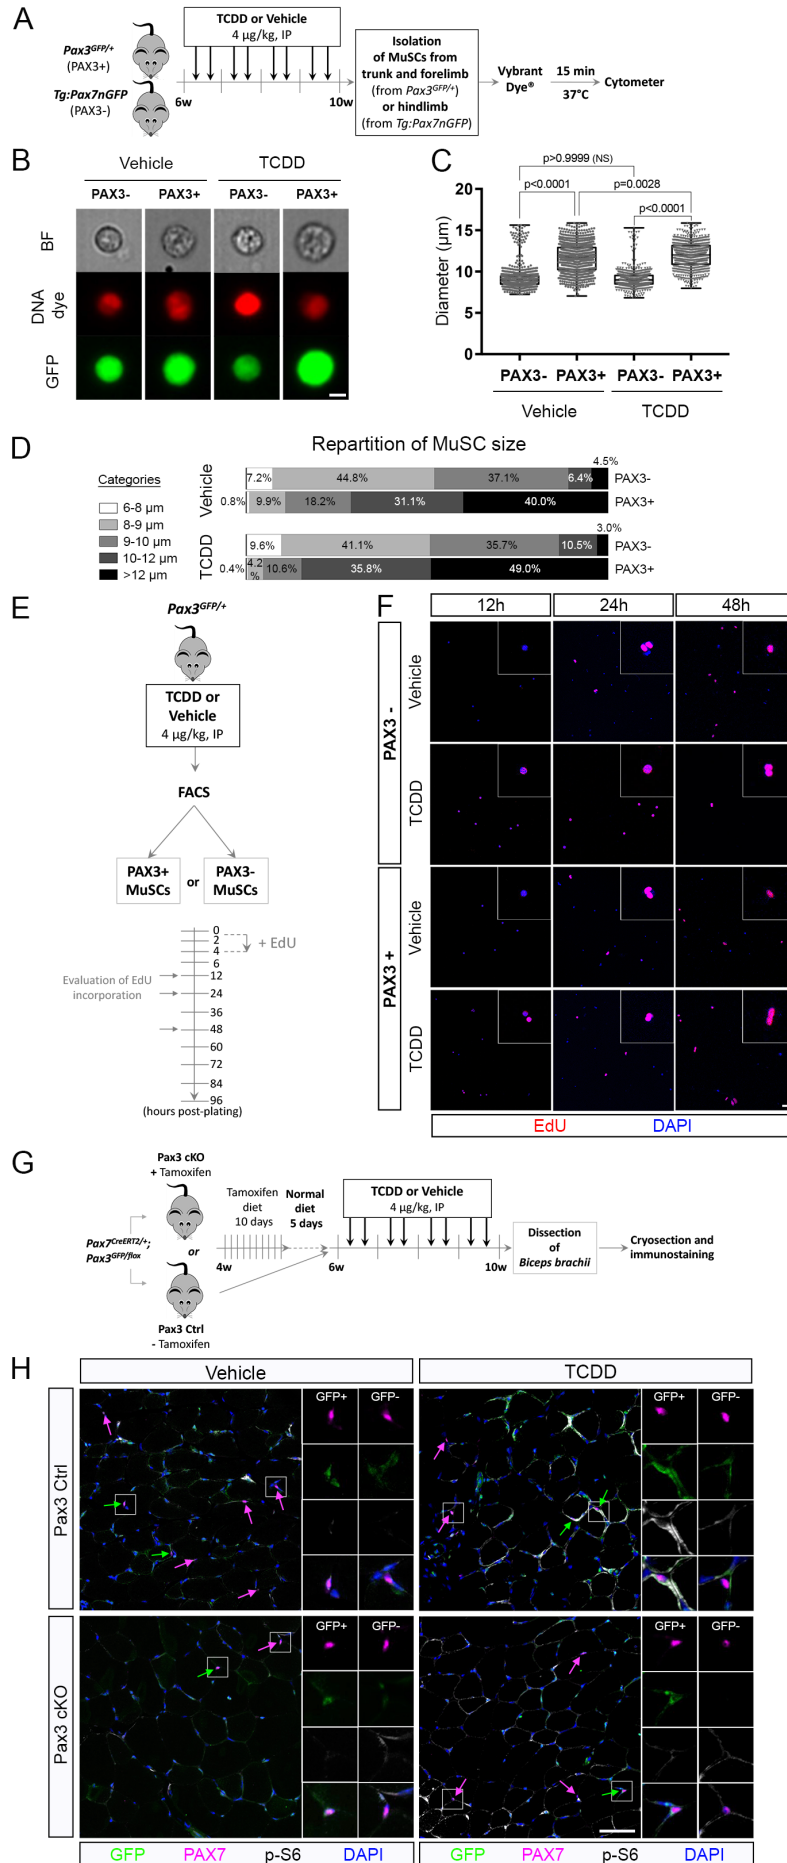

## Figure S5. Related to Figure 7

**(A)** Experimental design: *Pax3*<sup>GFP/+</sup> or *Tg:Pax7nGFP* mice received intraperitoneal administration of vehicle (nonane) or TCDD (4µg/kg) twice a week during four weeks before isolation of MuSCs from trunk and forelimb (*Pax3*<sup>GFP/+</sup>, PAX3+ MuSCs) or hindlimb (*Tg:Pax7nGFP*, PAX3- MuSCs) muscles. MuSCs were stained with Vybrant Dye<sup>®</sup>, a cell permeable DNA dye, before their size characterization by flow cytometry.

**(B)** Representative picture of brightfield (BF, top), DNA (red, middle) and GFP (green, bottom) staining performed on single isolated PAX3- or PAX3+ MuSCs treated with vehicle (nonane) or TCDD (4µg/kg). Scale bar, 5 µm.

**(C)** Dot blots showing the diameter (µm) repartition of PAX3- (GFP-) or PAX3+ (GFP+) MuSCs from mice treated with vehicle (nonane) or TCDD (4µg/kg). Means ± SEM (n=5000 cells per conditions), two-way ANOVA. *P* values calculated by Sidak's post-test. N.S., not significant.

**(D)** Graphs represent the size repartition of MuSCs categorized in 5 groups distributed between 6 to 8 µm, 8 to 9 µm, 9 to 10 µm, 10 to 12 µm and cell diameter superior to 12 µm regarding their expression of PAX3 upon vehicle (top) or TCDD (bottom) treatment.

**(E)** Experimental design: *Pax3*<sup>GFP/+</sup> mice received intraperitoneal administration of vehicle (nonane) or TCDD (4µg/kg) twice a week during four weeks before isolation of PAX3- (GFP-) or PAX3+ (GFP+) MuSCs by FACS. Isolated MuSCs were used to determine EdU incorporation at different time points after a 4h-Edu pulse (10 µM).

**(F)** Representative co-immunostaining of EdU (red) and nuclear staining (DAPI, blue) in GFP- (PAX3-, top) and GFP+ (PAX3+, bottom) MuSCs from *Pax3*<sup>GFP/+</sup> mice receiving vehicle or TCDD treatment performed 12, 24 and 48h post-plating.

**(G)** Experimental design: *Pax3*<sup>GFP/+</sup> mice or *Pax7Cre*<sup>ERT2/+</sup>; *Pax3*<sup>flox/flox</sup> mice received normal diet (Pax3 Ctrl) or tamoxifen food (Pax3 cKO) for 10 days followed by 5 days of normal diet prior intraperitoneal administration of vehicle (nonane) or TCDD (4µg/kg) twice a week during four weeks. Cryosections of *biceps brachii* (biceps) were performed at the end of the TCDD treatment (10 weeks) for Pax3 Ctrl and Pax3 cKO mice, and 1 month (14 weeks) or 2 months (18 weeks) post-treatment for *Pax3*<sup>GFP/+</sup> mice in order to evaluate mTORC1 activation in PAX3-negative (GFP-) and PAX3-positive (GFP+) MuSCs by phospho-S6 ribosomal protein (p-S6) immunostaining.

**(H)** Representative co-immunofluorescence staining of GFP (PAX3 reporter, green), PAX7 (pink), p-S6 (white) and nuclear staining (DAPI, blue) in biceps sections from Pax3 Ctrl (top) and Pax3 cKO (bottom) mice receiving vehicle (nonane) or TCDD (4µg/kg) treatment. Insets show co-immunostaining of GFP+ (left) and GFP- (right) MuSCs. Pink arrows designate PAX3- MuSCs. Green arrows indicate PAX3+ MuSCs. Scale bar, 50 µm.

## Supplementary Table

**Table S1:** List of qPCR oligonucleotides used in this study related to STAR Methods.

| Gene                 | Sequence                           | Name                                     |
|----------------------|------------------------------------|------------------------------------------|
| <i>AHR</i>           | 5' - GACTTCTGCAGACAGCTACA - 3'     | Aryl Hydrocarbon Receptor Repressor      |
|                      | 5' - TGTCAGAAGGCGGAGTACT - 3'      |                                          |
| <i>Cyp1a1</i>        | 5' - CAGCCTTCCCAAATGGTTTA - 3'     | P450 Cytochrome 1A1                      |
|                      | 5' - GCCTGGGCTACACAAGACTC - 3'     |                                          |
| <i>Pax3</i>          | 5' - TGCCCTCAGTGAGTTCTATCAGC - 3'  | Paired Box 3                             |
|                      | 5' - GCTAAACCAGACCTGCACTCGGGC - 3' |                                          |
| <i>MyoD</i>          | 5' - TAGTAGGCGGTGTCGTAGCC - 3'     | Myogenic Differentiation 1               |
|                      | 5' - TACAGTGGCGACTCAGATGC - 3'     |                                          |
| <i>Hprt1</i>         | 5' - AGGGCATATCCAACAACAACTT - 3'   | Hypoxanthine Phosphoribosyltransferase 1 |
|                      | 5' - GTTAAGCAGTACAGCCCCAAA - 3'    |                                          |
| <i>Tbp</i>           | 5' - ATCCAAGCGATTTGCTG - 3'        | TATA Box Protein                         |
|                      | 5' - CCTGTGCACACCATTTTTCC - 3'     |                                          |
| <i>AHR</i>           | 5' - TTCCAGGTTCTCAGGCATTC - 3'     | Aryl hydrocarbon receptor                |
|                      | 5' - TGGGAGCTACAGGAATCCAC - 3'     |                                          |
| <i>AHR primers 1</i> | 5' - ATGTTTCGTCGGTAGAGCAGT - 3'    | Aryl hydrocarbon receptor                |
|                      | 5' - ACACCAAATCCTCTCTCGTCC - 3'    |                                          |
| <i>AHR primers 2</i> | 5' - AACATCACCTATGCCAGCCG - 3'     | Aryl hydrocarbon receptor                |
|                      | 5' - GGTCTCTGTGTCGCTTAGAAGG - 3'   |                                          |
| <i>AHR primers 3</i> | 5' - AAGCTGGACAACTCTCTGTTCTT - 3'  | Aryl hydrocarbon receptor                |
|                      | 5' - GCCAGTCTCTGATTTGTGCTCTA - 3'  |                                          |
| <i>Cyp1a2</i>        | 5' - ACAACGAGGGACACCTCAC - 3'      | P450 Cytochrome 1A2                      |
|                      | 5' - GGGATCTCCCAATGCAC - 3'        |                                          |
| <i>Cyp1b1</i>        | 5' - AGGATGTGCCTGCCACTATT - 3'     | P450 Cytochrome 1B1                      |
|                      | 5' - AGCTGGAGAATCGCATTGAT - 3'     |                                          |
| <i>Nqo1</i>          | 5' - TCTGCAGCTTCCAGCTTCTTG - 3'    | NAD(P)H Quinone Dehydrogenase 1          |
|                      | 5' - TATCCTCCGAGTCATCTCTAGCA - 3'  |                                          |
